# Supplementary material for: Transcriptional Repression of Aerobic Glycolysis by OVOL2 in Breast Cancer
Source: PubMed Central journal article supplement (PMC9507357; doi:10.1002/advs.202200705), 2022-07-27
Supplement: ADVS-9-2200705-s004.pdf [file ADVS-9-2200705-s004.pdf]

## Supporting Information

for *Adv. Sci.*, DOI 10.1002/adv.202200705

Transcriptional Repression of Aerobic Glycolysis by OVOL2 in Breast Cancer

*Xiujuan Zhang, Fei Luo, Shaliu Luo, Ling Li, Xinxin Ren, Jing Lin, Yingchun Liang, Chao Ma, Lihua Ding, Deyu Zhang, Tianxing Ye, Yanni Lin, Bilian Jin, Shan Gao and Qinong Ye\**

**Supplementary Table 1. Potential OVOL2-interacting proteins identified by Co-IP and mass spectrometry**

| <b>Protein name</b> | <b>Description</b>                                                                            | <b>Mass (Dalton)</b> | <b>Score</b> |
|---------------------|-----------------------------------------------------------------------------------------------|----------------------|--------------|
| NCoR                | Nuclear receptor corepressor                                                                  | 270212               | 126          |
| $\beta$ -catenin    | Catenin beta-1                                                                                | 86069                | 421          |
| $\alpha$ -catenin   | Catenin alpha-1                                                                               | 100693               | 127          |
| $\delta$ -catenin   | Catenin delta-1                                                                               | 108674               | 38           |
| MDM2                | Murine double minute 2, human homologue                                                       | 56323                | 89           |
| HDAC1               | Histone deacetylase 1                                                                         | 55638                | 97           |
| HDAC3               | Histone deacetylase 3                                                                         | 48848                | 106          |
| SVIL                | Supervillin                                                                                   | 249417               | 791          |
| ZO1                 | Tight junction protein ZO-1                                                                   | 195682               | 671          |
| LIMA1               | LIM domain and actin-binding protein 1                                                        | 85630                | 436          |
| PRMT5               | Protein arginine N-methyltransferase 5                                                        | 73322                | 312          |
| RPS27A              | Ubiquitin-40S ribosomal protein S27a                                                          | 18296                | 205          |
| FLII                | Protein flightless-1 homolog                                                                  | 146142               | 182          |
| HSP90AA1            | Heat shock protein HSP 90-alpha                                                               | 85006                | 153          |
| SCYL2               | SCY1-like protein 2                                                                           | 104327               | 101          |
| EFHD2               | EF-hand domain-containing protein D2                                                          | 26794                | 96           |
| MISP                | Mitotic interactor and substrate of PLK1                                                      | 75482                | 85           |
| TMOD3               | Tropomodulin-3                                                                                | 39741                | 84           |
| EPSTI1              | Epithelial-stromal interaction protein 1                                                      | 36942                | 79           |
| SIPA1L1             | Signal-induced proliferation-associated 1-like protein 1                                      | 201102               | 79           |
| N4BP3               | NEDD4-binding protein 3                                                                       | 60889                | 72           |
| TRIP11              | Thyroid receptor-interacting protein 11                                                       | 228131               | 48           |
| THRAP3              | Thyroid hormone receptor-associated protein 3                                                 | 108658               | 195          |
| BCLAF1              | Bcl-2-associated transcription factor 1                                                       | 106173               | 95           |
| SMARCA5             | SWI/SNF-related matrix-associated actin-dependent regulator of chromatin subfamily A member 5 | 122513               | 79           |
| MEP50               | Methylosome protein 50                                                                        | 37442                | 71           |
| PPP1R12A            | Protein phosphatase 1 regulatory subunit 12A                                                  | 115610               | 69           |
| IPO9                | Importin-9                                                                                    | 116858               | 51           |
| NEB2                | Neurabin-2                                                                                    | 89309                | 120          |
| IMB1                | Importin subunit beta-1                                                                       | 98420                | 81           |
| SSRP1               | FACT complex subunit SSRP1                                                                    | 81367                | 60           |
| UNC45A              | Protein unc-45 homolog A                                                                      | 104266               | 308          |
| MIC60               | MICOS complex subunit MIC60                                                                   | 84026                | 239          |
| MCM7                | DNA replication licensing factor MCM7                                                         | 81884                | 226          |
| NUP93               | Nuclear pore complex protein Nup93                                                            | 93943                | 196          |

|          |                                                                   |        |     |
|----------|-------------------------------------------------------------------|--------|-----|
| XRCC5    | X-ray repair cross-complementing protein 5                        | 83222  | 190 |
| DHX15    | Pre-mRNA-splicing factor ATP-dependent RNA helicase DHX15         | 91673  | 174 |
| IQGAP1   | Ras GTPase-activating-like protein IQGAP1                         | 189761 | 101 |
| MLH1     | DNA mismatch repair protein Mlh1                                  | 85175  | 76  |
| STAT1    | Signal transducer and activator of transcription1-alpha/beta      | 87850  | 74  |
| CAND2    | Cullin-associated NEDD8-dissociated protein 2                     | 136653 | 45  |
| PPM1B    | Protein phosphatase 1B                                            | 53180  | 44  |
| LSR      | Lipolysis-stimulated lipoprotein receptor                         | 72534  | 396 |
| HSPA9    | Stress-70 protein                                                 | 73920  | 334 |
| AIFM1    | Apoptosis-inducing factor 1                                       | 67144  | 196 |
| TOM1L2   | TOM1-like protein 2                                               | 55864  | 174 |
| DDX5     | Probable ATP-dependent RNA helicase DDX5                          | 69618  | 137 |
| DDX17    | Probable ATP-dependent RNA helicase DDX17                         | 80906  | 85  |
| KARS     | Lysine--tRNA ligase                                               | 68461  | 79  |
| IVNS1ABP | Influenza virus NS1A-binding protein                              | 72937  | 73  |
| RUVBL1   | RuvB-like 1                                                       | 50538  | 117 |
| DDX39A   | ATP-dependent RNA helicase DDX39A                                 | 49611  | 85  |
| CAMK2D   | Calcium/calmodulin-dependent protein kinase type II subunit delta | 56961  | 56  |
| GIPC1    | PDZ domain-containing protein GIPC1                               | 36141  | 225 |
| HNRNPH3  | Heterogeneous nuclear ribonucleoprotein H3                        | 36960  | 126 |
| H2AFY    | Core histone macro-H2A.1                                          | 39764  | 59  |
| H4       | Histone H4                                                        | 11360  | 53  |
| DCAF7    | DDB1- and CUL4-associated factor 7                                | 39528  | 51  |
| PID1     | PTB-containing, cubilin and LRP1-interacting protein              | 28766  | 41  |
| TRA2A    | Transformer-2 protein homolog alpha                               | 32726  | 167 |
| HNRNPA3  | Heterogeneous nuclear ribonucleoprotein A3                        | 39799  | 149 |
| HNRNPA1  | Heterogeneous nuclear ribonucleoprotein A1                        | 38837  | 148 |
| POLDIP2  | Polymerase delta-interacting protein 2                            | 42235  | 119 |
| U2AF1    | Splicing factor U2AF 35 kDa subunit                               | 28368  | 86  |
| DCD      | Dermcidin                                                         | 11391  | 66  |
| RALY     | RNA-binding protein Raly                                          | 32501  | 55  |
| H3F3C    | Histone H3.3C                                                     | 15318  | 46  |
| CDK9     | Cyclin-dependent kinase 9                                         | 43149  | 45  |
| ARF4     | ADP-ribosylation factor 4                                         | 20612  | 137 |
| AIF1L    | Allograft inflammatory factor 1-like                              | 17114  | 132 |
| ARF1     | ADP-ribosylation factor 1                                         | 20741  | 118 |
| ARF3     | ADP-ribosylation factor 3                                         | 20645  | 118 |
| JAGN1    | Protein jagunal homolog 1                                         | 21111  | 97  |
| TAF12    | Transcription initiation factor TFIID subunit 12                  | 18027  | 76  |

|         |                                                            |       |     |
|---------|------------------------------------------------------------|-------|-----|
| UBE2V2  | Ubiquitin-conjugating enzyme E2 variant 2                  | 16409 | 74  |
| RBM3    | RNA-binding protein 3                                      | 17160 | 70  |
| TMED2   | Transmembrane emp24 domain-containing protein 2            | 22860 | 70  |
| H2B1B   | Histone H2B type 1-B                                       | 13942 | 69  |
| NME2    | Nucleoside diphosphate kinase B                            | 17401 | 65  |
| ARL8B   | ADP-ribosylation factor-like protein 8B                    | 21753 | 62  |
| CDC42   | Cell division control protein 42 homolog                   | 21587 | 50  |
| CALM1   | Calmodulin                                                 | 16827 | 478 |
| ARF5    | ADP-ribosylation factor 5                                  | 20631 | 220 |
| SEC11A  | Signal peptidase complex catalytic subunit SEC11A          | 20612 | 80  |
| REEP5   | Receptor expression-enhancing protein 5                    | 21707 | 76  |
| LAMTOR1 | Ragulator complex protein LAMTOR1                          | 17848 | 69  |
| PDZD11  | PDZ domain-containing protein 11                           | 16121 | 69  |
| ARF6    | ADP-ribosylation factor 6                                  | 20183 | 66  |
| TCP4    | Activated RNA polymerase II transcriptional coactivatorp15 | 14386 | 63  |
| PDCD6   | Programmed cell death protein 6                            | 21912 | 62  |
| NRBF2   | Nuclear receptor-binding factor 2                          | 32529 | 55  |
| H2AV    | Histone H2A.V                                              | 13501 | 49  |
| H2AZ    | Histone H2A.Z                                              | 13545 | 49  |

**Supplementary Table 2. The cDNA target sequences of shRNAs or siRNAs.**

| <b>Gene</b>        | <b>Target sequence (5'→3')</b> |
|--------------------|--------------------------------|
| p53 (siRNA/shRNA)  | AAGACUCCAGUGGUAUCUAC           |
| MDM2 (siRNA/shRNA) | GCUUCGGAACAAGAGACUC            |
| PKM2 (shRNA)       | CCAUAUCGUCCUCACCAA             |
| LDHA (shRNA)       | GGAGAAAGCCGUCUAAAU             |
| NCoR (shRNA)       | GCUCCUCUCAGCACAGUAU            |
| HDAC3 (shRNA)      | CCAAGAGUCUAAUGCCUU             |

**Supplementary Table 3. Primers used for real-time PCR.**

| Gene              | Species | Forward (5'→3')             | Reverse (5'→3')             |
|-------------------|---------|-----------------------------|-----------------------------|
| GLUT1             | Human   | CATCCCATGGTTCATCGTGGCTGAACT | GAAGTAGGTGAAGATGAAGAACAGAAC |
| HK2               | Human   | GCCATCCTGCAACACTTAGGGCTTGAG | GTGAGGATGTAGCTTGTAGAGGGTCCC |
| GPI               | Human   | TATTGTGTTACCAAGCTCACACC     | TGGTAGAAGCGTCGTGAGAGGTC     |
| PFKL              | Human   | GGAGAAGCTGCGCGAGGTTTAC      | ATTGTGCCAGCATCTTCAGCATGAG   |
| ALDOA             | Human   | AGGCCATGCTTGCCTCAGAAGT      | AGGGCCCAGGGCTTCAGCAGG       |
| GAPDH             | Human   | TTCCGTGTCCCACTGCCAACGT      | CAAAGGTGGAGGAGTGGGTGTCCG    |
| PGK1              | Human   | ATGTCGCTTTCTAACAAGCTGA      | GCGGAGGTTCTCCAGCA           |
| PGAM1             | Human   | GGAAACGTGTACTGATTGCAGCCC    | TTCCATGGCTTTCGCACCGTCT      |
| ENO1              | Human   | GACTTGGCTGGCAACTCTG         | GGTCATCGGGAGACTTGAA         |
| PKM2              | Human   | GCCCCGTGAGGCAGAGGCTGC       | TGGTGAGGACGATTATGGCCC       |
| LDHA              | Human   | ATGGCAACTCTAAAGGATCA        | GCAACTTGCAGTTCGGGC          |
| $\alpha$ -Tubulin | Human   | CCAAGCTGGAGTTCTCTA          | CAATCAGAGTGCTCCAGG          |
| ASCL1             | Human   | CGCGTCAAGTTGGTCAACCTG       | GGCCATGGAGTTCAAGTCGTTG      |
| CREB3L1           | Human   | TTGATGACCCTGTGCTGGATGAG     | GCTCCTGCTTCACCATGATGGAG     |
| OVOL2             | Human   | TCACCTCAAGTGCCACAACCAG      | CCGCTGCTTATAGGCATACTGC      |
| MSX1              | Human   | TCAAGCTGCCAGAAGATGCGC       | GGTACTGCTTCTGGCGAACTTG      |
| MSX2              | Human   | CTCATGTCCGACAAGAAGCCG       | CGGCTTCCGATTGGTCTTGTC       |
| ATF3              | Human   | TCTGCGCTGGAATCAGTCACTG      | GAGCCTTCAGTTCAGCATTACAC     |
| KLF7              | Human   | CCAGGAGCTACAACCTGTCCAC      | TCTTCTCACAGATGGCCGCTTC      |
| GLUT1             | Mouse   | CATGGTTCATTGTGGCCGAGCTGT    | TCGGCCTTTGGTCTCAGGGACTTT    |
| HK2               | Mouse   | CCTGCTACAGGTCCGAGCCATCTT    | GAGGATGAAGCTTGTACAGTGTC     |
| GPI               | Mouse   | AACCGGCCGACCAACTCAAT TGTG   | TGCCGTCCAGCTCTGGCTCAATTT    |
| PFKL              | Mouse   | AATGTGCTGGGCCACTTGCAGCAG    | TGACCGGACTGAAGGCCACTACCT    |
| ALDOA             | Mouse   | ATGAGGAGATTGCCATGGCAACGG    | TTTAGAGCAGAGGCCTGCAGGGCT    |
| GAPDH             | Mouse   | GGGACAAGGATAGTCATTTTGGGG    | TGTCATTGAGAGCAATGCCAGCCC    |
| PGK1              | Mouse   | AGACTGGCCAAGCTACTGTGGCCT    | GAAGTGGCTTTCACCACCTCATCC    |
| PGAM1             | Mouse   | TACGCAGACCTTACTGAAGACCAG    | AGCTCCATGATGGCCTCTTCTGAG    |
| ENO1              | Mouse   | ACCAACCCTAAGCGGATTGCCAAG    | AGTCTTGATCTGCCAGTGCAGAG     |
| PKM2              | Mouse   | TCGCATGCAGCACCTGATT         | CCTCGAATAGCTGCAAGTGGTA      |
| LDHA              | Mouse   | GCAGACAAGGAGCAGTGGAAAGGAG   | ACACTGAGGAAGACATCCTCATTG    |
| $\alpha$ -Tubulin | Mouse   | AACCAGATGGTGAAATGTGACCCT    | CACAGTGGGAGGCTGGTAGTTAAT    |

**Supplementary Table 4. Primers used for ChIP.**

| Gene           | Forward (5'→3')           | Reverse (5'→3')          |
|----------------|---------------------------|--------------------------|
| GLUT1/2        | GTGAAACCCCGTCTCTACTAA     | TCTCAGACAGAGTCTCGCTCTG   |
| GLUT3          | TTGGTCTTTCTACAACCCTACGAG  | CTTCTCTAGCAAATGGTGGAGCC  |
| HK2-1          | GAAATAAGCCTGCAACTCCAGGA   | GAGTCCCTGTTTGCTCTATTGG   |
| HK2-2          | AGAGGGTGGAGGGCAGCCCCGAAT  | GGGATGTTGAGGACAGTTAATCAC |
| GPI            | GACAAGGTGTTGCTGTGTCA      | AGGTGGGATAGCTTGACG       |
| PFKL-1         | GCCATCCTGTTTTCCACAGCAGCT  | AGGCAGAGGTTGCAGTGAGTGGAG |
| PFKL-2         | TGCCTCAGCCTCCTGCATAGCT    | ATAATCCCAGAACTTTGGG      |
| ALDOA-1        | TCATGCCAGTAATCCTAGCAC     | CTCCTGGGTTCAAGCGATT      |
| ALDOA-2        | AGCACTTTGGGAAGCTGAG       | TGTTCAAGTGATTACCTGCC     |
| ALDOA-3        | GACAGAGCGAGACTCCGTCTCA    | GACAGAGCGAGACTCCGTCTCA   |
| GAPDH          | GGTCCCAGCTTAGGTTTCATCAGGT | TGGCCAGGAAGACGCTTGAAAAGG |
| PGK1-1         | TGAAACTCTGGTCTCCCGC       | ACGAAAGTGTAACCGCCCA      |
| PGK1-2         | AGCGGCGCCGACCCTGGGTCT     | CGAAGATCCGGGTGACGCTGC    |
| PGK1-3         | CGCAGCGTCACCCGGATCTTCG    | TTTGTACGTCCGGCACGCCGC    |
| PGK1-4         | AAGGTTCCCTGCGGTTCCG       | TGCTGAGCAGCCGCTATTG      |
| PGAM1-1        | GGCACTGTGGCTCACGCTGGTAAT  | GTTTAAGCAATTCTGCTGCCTCAG |
| PGAM1-2        | AGATCGCACCACTGCCTCCAGTCT  | CTTTCACACACGTTAAGTCAGTGC |
| ENO1-1         | TCCACGGAATATGACCCGT       | CACGTGCTTCCCCAGTGTT      |
| ENO1-2         | CCAGCGCCCCAACCCCGGAGTG    | CCCTCGACCTTGCTGACAACCTTG |
| PKM2-1         | TTATTACATGGCCCCAAC        | AGTAGGGAGAAGTAGGGACT     |
| PKM2-2         | TCCGAAGGCGGCCAGGACCTCCA   | ACTCCTCCGGGTGCTGCTCTGG   |
| LDHA-1         | TGGAATCAGCAAGAATACAGGCC   | CTGAGAAGATGGGATTACAGCCAG |
| LDHA-2         | TGAGGCAGGAGATTGCTTGAACC   | TTCTGGCTCAAGCGATCCTCCCA  |
| GLUT1-Upstream | TGCATTTGCAGAGGGTCGGA      | ACAAGAGGGGATAGCAGGGG     |
| HK2-Upstream   | TGATTATTATCCGGTTCACATGAAA | AAATGAAGAGGAGGATGCCTGC   |
| GPI-Upstream   | ACCGTGCCCGGCCCTCATTAC     | CTACCAACACGGCCACTACTCC   |
| PFKL-Upstream  | TCACTCTGTCCCGCAGCACA      | GCTGTTTACAGCCGAGCACT     |
| ALDOA-Upstream | TCACACCTGTAATCCCAGCA      | GTGTGATCTCAGTCACTGC      |
| PGK1-Upstream  | GCCAACAAGGGTGTCTCTTAGAG   | CAGAAGCAACCCCACTGATCCAC  |
| PGAM1-Upstream | AGGCAAGTCTTCCCCTACCA      | GAGGCAGAGGTTGCAGTGAG     |
| ENO1-Upstream  | AAGCGGGATGTGGGTACACA      | TGTGAAAGAGGGTCTCCAGC     |
| PKM2-Upstream  | CTTCTGAAATGGGGTCTTGCAAC   | AGCAGGCCTCAGAGAACAGAATTC |
| LDHA-Upstream  | GTAGTCCCAGTCACTTCGGG      | CTGCACTTTCTACTGCCAC      |

**Supplementary Table 5. Clinicopathological data of breast cancer samples.**

|           | No. of cases | No. of disease-free survival (%) | No. of overall survival (%) |
|-----------|--------------|----------------------------------|-----------------------------|
| Age years |              |                                  |                             |
| <40       | 14           | 6 (18.2%)                        | 8 (9.0%)                    |
| 40-49     | 47           | 6 (18.2%)                        | 41 (46.1%)                  |
| 50-59     | 20           | 7 (21.2%)                        | 13 (14.6%)                  |
| 60-69     | 20           | 5 (15.1%)                        | 15 (16.8%)                  |
| ≥70       | 21           | 9 (27.3%)                        | 12 (13.5%)                  |
| Total     | 122          | 33 (100.0%)                      | 89 (100.0%)                 |
| ER        |              |                                  |                             |
| Negative  | 38           | 12 (36.4%)                       | 26 (29.2%)                  |
| Positive  | 84           | 21 (63.6%)                       | 63 (70.8%)                  |
| Total     | 122          | 33 (100.0%)                      | 89 (100.0%)                 |
| PR        |              |                                  |                             |
| Negative  | 55           | 19 (57.6%)                       | 36 (40.4%)                  |
| Positive  | 67           | 14 (42.4%)                       | 53 (59.6%)                  |
| Total     | 122          | 33 (100.0%)                      | 89 (100.0%)                 |
| HER2      |              |                                  |                             |
| Negative  | 97           | 22 (66.7%)                       | 75 (84.3%)                  |
| Positive  | 25           | 11 (33.3%)                       | 14 (15.7%)                  |
| Total     | 122          | 33 (100.0%)                      | 89 (100.0%)                 |
